# The Brain Dynamics Toolbox for Matlab

Stewart Heitmann, Matthew J Aburn, Michael Breakspear

*QIMR Berghofer Medical Research Institute  
300 Herston Road, Herston QLD 4006, Australia*

---

## Abstract

Nonlinear dynamical systems are increasingly informing both theoretical and empirical branches of neuroscience. The Brain Dynamics Toolbox provides an interactive simulation platform for exploring such systems in MATLAB. It supports the major classes of differential equations that arise in computational neuroscience: Ordinary Differential Equations, Delay Differential Equations and Stochastic Differential Equations. The design of the graphical interface fosters intuitive exploration of the dynamics while still supporting scripted parameter explorations and large-scale simulations. Although the toolbox is intended for dynamical models in computational neuroscience, it can be applied to dynamical systems from any domain.

*Keywords:* initial-value problems, differential equations, numerical integration, visualization, brain dynamics

---

## 1. Introduction

1 Computational neuroscience relies heavily on numerical methods for simulating non-linear models of brain dynamics. Software toolkits are the manifestation of those endeavors. Each one represents an attempt to balance mathematical flexibility with computational convenience. Toolkits such as GENESIS [1], NEURON [2] and BRIAN[3] provide convenient methods to simulate conductance-based models of single neurons and networks thereof. The Virtual Brain [4] scales up that approach to the macroscopic dynamics of the whole brain by combining neural field models [5] with anatomical connectivity datasets [6]. Mathematical toolkits such as AUTO [7], XPPAUT [8], MATCONT [9], PyDSTool [10] and CoCo [11] are useful for analyzing non-linear dynamics but assume advanced mathematical theory.

## 13 2. Problems and Background

14 In our experience, the existing computational toolkits often present tech-  
15 nical barriers to broader audiences in cognitive neuroscience, systems neuro-  
16 science and neuroimaging. For example, GENESIS [1], NEURON [2], BRIAN [3]  
17 and XPPAUT [8] each use idiosyncratic languages for defining the differential  
18 equations. The Virtual Brain [4], CoCo [11] and PyDSTool [10] use conven-  
19 tional programming languages (Python and MATLAB) but assume advanced  
20 object-oriented programming techniques that broader audiences often find  
21 confusing. Of all of the existing toolkits, only XPPAUT [8] and the Virtual  
22 Brain [4] are capable of supporting Ordinary Differential Equations (ODEs),  
23 Delay Differential Equations (DDEs) and Stochastic Differential Equations  
24 (SDEs). Our Brain Dynamics Toolbox aims to bridge these technical barriers  
25 by allowing those with diverse backgrounds to explore neuronal dynamics  
26 through phase space analysis, time series exploration and other methods with  
27 minimal programming burden. A custom system of ODEs, DDEs or SDEs  
28 can typically be implemented in fewer than 100 lines of standard MATLAB  
29 code. Object-oriented programming techniques are not required. Once the  
30 model is implemented, it can be run interactively in the graphical interface  
31 (Figure 1) where a variety of different plotting panels and numerical solvers  
32 can be applied with no additional programming effort. The internal states  
33 of the graphical interface are accessible to the user’s workspace so that pa-  
34 rameter sweeps can be semi-automated in the command window with simple  
35 for-loop statements. Additional command-line tools are also provided for  
36 scripting fully-automated simulations in batch mode. Such scripts may be  
37 called from third-party MATLAB applications and vice versa. Large-scale  
38 simulations can be scripted to run in parallel using the MATLAB Parallel  
39 Computing Toolbox or the MATLAB Distributed Computing Server. Unfor-  
40 tunately the toolbox does not run on *Octave* [12] because of incompatibilities  
41 in the graphical interface class libraries.

## 42 3. Software Framework

43 The toolbox operates on user-defined systems of ODEs, DDEs and SDEs.  
44 The details differ slightly for each type of differential equation but the overall  
45 approach is the same. For an ODE,

$$\frac{dY}{dt} = F(t, Y),$$

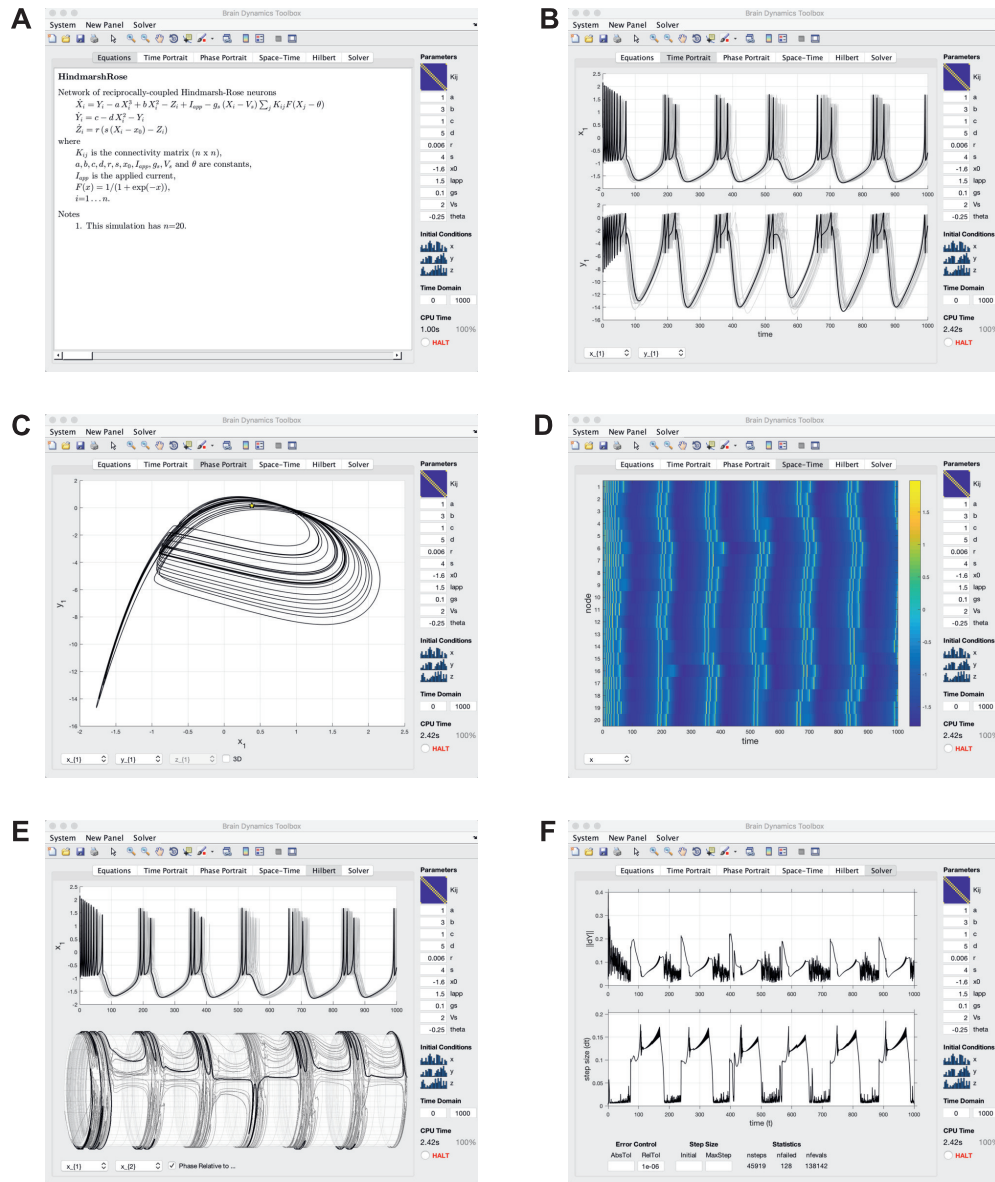

Figure 1: Screenshots of selected display panels in the graphical interface as it simulates a network of  $n=20$  Hindmarsh-Rose [13] neurons. The parameters of the model appear in the control panel on the right-hand side of the application window. The solution is automatically recomputed each time any of those controls are altered. Individual controls can be scalar, vector or matrix values thereby accommodating arbitrarily large parameter sets. **A** Mathematical equations rendered with LaTeX. **B** Time portraits. **C** Phase portrait. **D** Space-time portrait. **E** Hilbert transform. **F** Solver step sizes.

46 the right-hand side of the equation is implemented as a matlab function of  
47 the form  $dYdt=F(t,Y)$ . The toolbox takes a handle to that function and  
48 passes it to the relevant solver routine on the user's behalf. The solver  
49 repeatedly calls  $F(t,Y)$  in the process of computing the evolution of  $Y(t)$   
50 from a given set of initial conditions. The toolbox uses the same approach  
51 as the standard MATLAB solvers (e.g. `ode45`) except that it also manages  
52 the input parameters and plots the solver output. To do so, it requires  
53 the names and values of the system parameters and state variables. Those  
54 details (and more) are passed to the toolbox via a special data structure that  
55 we call a *system structure*. It encapsulates everything needed to simulate a  
56 user-defined model. Once a system structure has been constructed, it can be  
57 shared with other toolbox users.

### 58 *3.1. Software Architecture and Functionality*

59 The hub-and-spoke software architecture (Figure 2) allows arbitrary com-  
60 binations of solver routines and display panels to be applied to any model.  
61 The modular design also allows new solver routines and display panel classes  
62 to be added to the toolbox incrementally. The list of numerical solver  
63 routines and graphical panels that the toolbox supports continues to grow  
64 rapidly. The current version (2017c) supports the standard ODE solvers  
65 (`ode45`, `ode23`, `ode113`, `ode15s`, `ode23s`) and DDE solver (`dde23`) that  
66 are shipped with MATLAB. As well as a fixed-step ODE solver (`odeEul`) and  
67 two SDE solvers (`sdeEM`, `sdeSH`) that are specific to the Brain Dynamics  
68 Toolbox. The two SDE solvers are specialized for stochastic equations that  
69 use Itô calculus and Stratonovich calculus respectively.

70 The display panels can be used to visualize the dynamics, compute met-  
71 rics from the time-series, or transform them into new time-series. The tool-  
72 box currently includes display panels for rendering mathematical equations,  
73 time plots, phase portraits, space-time plots, computing linear correlations,  
74 Hilbert transforms, surrogate data transforms and inspecting the individual  
75 steps taken by the solvers. The panel outputs are themselves accessible to  
76 the user's workspace as read-only variables. New panels can be added to the  
77 toolbox at any time and we encourage advanced users to write custom panels  
78 for their own projects although that level of graphical interface development  
79 does involve object-oriented programming.

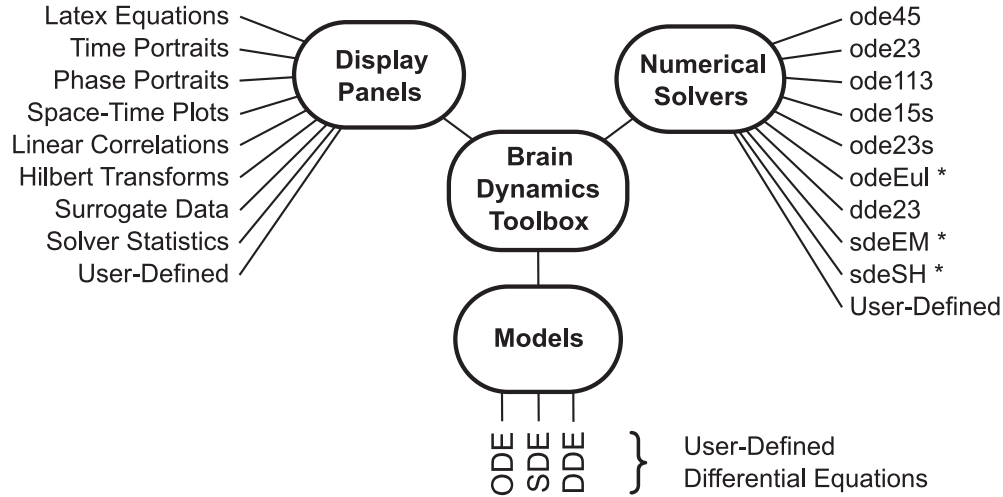

Figure 2: The hub-and-spoke software architecture of the Brain Dynamics Toolbox. Numerical solvers marked with an asterisk are unique to the toolbox.

#### 80 4. Illustrative Example

We demonstrate the implementation of a network of recurrently-connected Hindmarsh-Rose [13] neurons,

$$\dot{X}_i = Y_i - a X_i^3 + b X_i^2 - Z_i + I_i - I_i^{net}, \quad (1)$$

$$\dot{Y}_i = c - d X_i^2 - Y_i, \quad (2)$$

$$\dot{Z}_i = r (s (X_i - x_0) - Z_i), \quad (3)$$

81 where  $X_i$  is the membrane potential of the  $i^{th}$  neuron,  $Y_i$  is the conductance  
 82 of that neuron's excitatory ion channels, and  $Z_i$  is the conductance of its  
 83 inhibitory ion channels. Each neuron in the network is driven by a locally  
 84 applied current  $I_i$  and a network current  $I_i^{net} = g_s (X_i - V_s) \sum_j K_{ij} F(X_j - \theta)$   
 85 that represents the synaptic bombardment from other neurons. The sig-  
 86 moidal function  $F(x) = 1 / (1 + \exp(-x))$  transforms that synaptic bombard-  
 87 ment to an equivalent ionic current. The connectivity matrix  $K_{ij}$  defines the  
 88 weightings of the synaptic connections between neurons. All other param-  
 89 eters in the model are scalar constants. The model is a typical example of a  
 90 neuronal network as a system of coupled ODEs.

#### 91 4.1. Defining the equations

92 We define the right-hand side of equations (1–3) as MATLAB function  
93 of the form  $dY=F(t,Y,\dots)$  where the vector  $Y$  contains the instantaneous  
94 values of  $[X(t), Y(t), Z(t)]$  at time  $t$ . The ellipses denote model-specific pa-  
95 rameters.

```
961 % The ODE function for the Hindmarsh Rose model.  
972 function dY = odefun(t,Y,Kij,a,b,c,d,r,s,x0,I,gs,Vs,theta)  
983 % extract incoming variables from Y  
994 Y = reshape(Y,[],3); % reshape Y to (nx3)  
1005 x = Y(:,1); % x is (nx1) vector  
1016 y = Y(:,2); % y is (nx1) vector  
1027 z = Y(:,3); % z is (nx1) vector  
1038  
1049 % The network coupling term  
1050 Inet = gs*(x-Vs) .* Kij./(1+exp(-x+theta));  
1061  
1072 % Hindmarsh-Rose equations  
1083 dx = y - a*x.^3 + b*x.^2 - z + I - Inet;  
1094 dy = c - d*x.^2 - y;  
1105 dz = r*(s*(x-x0)-z);  
1116  
1127 % return result (3n x 1)  
1138 dY = [dx; dy; dz];  
1149 end
```

115 It is no coincidence that the form of this function is identical to that required  
116 by the standard ODE solvers, since the toolbox applies those same solvers  
117 to this function. In order to do so, it requires the names and initial values  
118 of the model’s parameters and state variables to also be defined. That is the  
119 purpose of the model’s system structure.

#### 120 4.2. Defining the system structure

121 The system structure (named `sys` by convention) encapsulates the func-  
122 tion handles and parameter settings that the toolbox needs to pass the user-  
123 defined ODE function to the solver and plot the solution that is returned.  
124 The most important fields of the structure are the handle to user-defined  
125 function (`sys.odefun`), the names and initial values of the system vari-  
126 ables (`sys.vardef`) and the names and values of the system parameters  
127 (`sys.pardef`). Once a system structure has been constructed, it can be  
128 saved to a *mat* file and used by the toolbox as is. Nonetheless it is common  
129 practice to provide a helper function that constructs a new system structure

130 for a particular configuration of the model. In this example, the configura-  
131 tion of the system variables depends on the size of the network connectivity  
132 matrix,  $K_{ij}$ .

```
1331 % Construct a system structure for the Hindmarsh-Rose model
1342 function sys = HindmarshRose(Kij)
1353     % Infer the number of neurons from the size of Kij
1364     n = size(Kij,1);
1375
1386     % Handle to our ODE function
1397     sys.odefun = @odefun;
1408
1419     % Our ODE parameters
1420     sys.pardef = [ struct('name','Kij', 'value',Kij);
1431                   struct('name','a', 'value',1);
1442                   struct('name','b', 'value',3);
1453                   struct('name','c', 'value',1);
1464                   struct('name','d', 'value',5);
1475                   struct('name','r', 'value',0.006);
1486                   struct('name','s', 'value',4);
1497                   struct('name','x0', 'value',-1.6);
1508                   struct('name','Iapp', 'value',1.5);
1519                   struct('name','gs', 'value',0.1);
1520                   struct('name','Vs', 'value',2);
1531                   struct('name','theta', 'value',-0.25) ];
1542
1553     % Our ODE variables
1564     sys.vardef = [ struct('name','x', 'value',rand(n,1));
1575                   struct('name','y', 'value',rand(n,1));
1586                   struct('name','z', 'value',rand(n,1)) ];
1597
1608     % Latex (Equations) panel
1619     sys.panels.bdLatexPanel.title = 'Equations';
1620     sys.panels.bdLatexPanel.latex = {
1631         '\textbf{HindmarshRose}';
1642         '';
1653         'Network of coupled Hindmarsh-Rose neurons';
1664         '\qqquad $\dot{X}_i = Y_i - a\,X_i^3 + b\,X_i^2 - Z_i +$
167         $I_{app} - g_s\,(X_i - V_s) \sum_j K_{ij} F(X_j - \theta)$';
1685         '\qqquad $\dot{Y}_i = c - d\,X_i^2 - Y_i$';
1696         '\qqquad $\dot{Z}_i = r\,(s\,(X_i - x_0) - Z_i)$';
1707         'where';
1718         '\qqquad $K_{ij}$ is the connectivity matrix,';
1729         '\qqquad $a, b, c, d, r, s, x_0, I_{app}, g_s, V_s$
173         and $\theta$ are constants,';
```

```
1740     '\qquad  $I_{app}$  is the applied current,';
1751     '\qquad  $F(x) = 1/(1+\exp(-x))$ ,';
1762     '\qquad  $i_{=1} \dots n$ .' };
1773 end
```

178 The order of the parameter definitions in the `pardef` field must match that  
179 of the `odefun` function. Likewise for the system variables in the `vardef` field.

180 The final part of the helper function (lines 28–42) defines the model-  
181 specific strings for rendering the mathematical equations in the LaTeX dis-  
182 play panel. Those LaTeX strings are important for documenting the model  
183 in the graphical interface but they play no part in the simulation itself.

#### 184 4.3. Running the model.

185 The model is run by loading an instance of the system structure into the  
186 toolbox graphical user interface, which is called `bdGUI`.

```
187 >> n = 20; % Define number of neurons.
188 >> Kij = circshift(eye(n),1) ... % Define connection matrix,
189     + circshift(eye(n),-1); % as a chain in this case.
190 >> sys = HindmarshRose(Kij); % Construct the sys struct.
191 >> bdGUI(sys); % Run the model in the GUI.
```

192 The graphical interface (Figure 1) allows the solution to be visualized with  
193 any number of display panels, all of which are updated concurrently. The  
194 solution is automatically recomputed whenever any of the graphical controls  
195 are adjusted; including the system parameters, the initial conditions of the  
196 state variables, the time domain of the simulation and the solver options.

#### 197 4.4. Controlling the model

198 The `bdGUI` application returns a handle to itself which can be used to  
199 control the simulation from the MATLAB command window.

```
200 >> gui = bdGUI(sys)
201 gui =
202     bdGUI with properties:
203         version: '2017c' % toolbox version string
204         fig: [1x1 Figure] % application figure handle
205         par: [1x1 struct] % system parameters (read-write)
206         var0: [1x1 struct] % initial conditions (read-write)
207         var: [1x1 struct] % solution variables (read-only)
```



```
208         t: [1x9522 double]    % solution time points (read-only)
209         lag: []                % DDE lag parameters (read-write)
210         sys: [1x1 struct]     % system structure (read-only)
211         sol: [1x1 struct]     % solver output (read-only)
212         sox: []               % auxiliary variables (read-only)
213         panels: [1x1 struct]  % display panel outputs (read-only)
```

214 The parameters of the model are all accessible by name via the `gui.par`  
215 structure. Likewise, the computed solution variables are accessible by name  
216 via the `gui.var` structure and also in the native format returned by the solver  
217 via the `gui.sol` structure. Parameter values written into the `gui.par` handle  
218 are immediately applied to the graphical user interface, and vice versa. Hence  
219 it is possible to use workspace commands to orchestrate parameter sweeps  
220 in the graphical user interface. For example, the workspace command

```
221 >> for r=linspace(0.05,0.001,25); gui.par.r=r; end;
```

222 sweeps the  $r$  parameter (time constant of inhibition) from 0.05 to 0.001 in 25  
223 increments. The graphical interface automatically recomputes the solution  
224 every time that `gui.par.r` is assigned a new value in the loop. The result is  
225 an animated sequence of simulations where bursting phenomenon is observed  
226 for  $r \lesssim 0.01$ .

#### 227 *4.5. Scripting the model*

228 The toolbox also provides a small suite of command-line tools for running  
229 models without invoking the graphical interface. Of these, the most notable  
230 commands are `bdSolve(sys,tspan)` which runs the solver on a given model  
231 for a given time span; and `bdEval(sol,t)` which interpolates the solution  
232 for a given set of time points.

```
233 >> t = 0:1000;
234 >> sol = bdSolve(sys,[t(1) t(end)]);
235 >> X = bdEval(sol,t);
236 >> plot(t,X);
```

237 The `bdEval` function is equivalent to the MATLAB `deval` function except that  
238 it also works for solution structures (`sol`) returned by third-party solvers.

## 239 5. Conclusions

240 The Brain Dynamics Toolbox provides researchers with an interactive  
241 graphical tool for exploring user-defined dynamical systems without the bur-  
242 den of programming bespoke graphical applications. The graphical interface  
243 imposes no limit the size of the model nor the number of parameters involved.  
244 System parameters and variables can range in size from simple scalar values  
245 to large-scale vectors or matrices without loss of generality. The design also  
246 imposes no barrier to scripting large-scale simulations and parameter sur-  
247 veys. The toolbox is aimed at students, engineers and researchers in com-  
248 putational neuroscience but it can also be applied to general problems in  
249 dynamical systems. It is supported with an extensive user manual [14] that  
250 provides detailed instructions for implementing new systems of ODEs, DDEs  
251 and SDEs. Once a new model is implemented, it can be readily shared with  
252 other toolbox users. The toolbox thus serves as a hub for sharing models as  
253 much as it serves as a tool for simulating them.

## 254 Acknowledgements

255 MATLAB<sup>®</sup> is a registered trademark of The Mathworks, Inc., 3 Apple  
256 Hill Drive, Natick, MA 01760-2098 USA, 508-647-7000, Fax 508-647-7001,  
257 *info@mathworks.com*, *www.mathworks.com*

- 258 [1] J. M. Bower, D. Beeman, The book of Genesis: exploring realistic neural  
259 models with the General Neural Simulation System., Telos, Springer,  
260 New York, 1998.
- 261 [2] N. T. Carnevale, M. L. Hines, The NEURON book, Cambridge Univer-  
262 sity Press, 2006.
- 263 [3] D. F. M. Goodman, R. Brette, BRIAN simulator, Scholarpedia 8 (1)  
264 (2013) 10883. doi:10.4249/scholarpedia.10883.
- 265 [4] V. Jirsa, O. Sporns, M. Breakspear, G. Deco, A. R. McIntosh, Towards  
266 the virtual brain: network modeling of the intact and the damaged brain,  
267 Archives Italiennes de Biologie 148 (3) (2010) 189–205.
- 268 [5] V. K. Jirsa, H. Haken, Field theory of electromagnetic brain activity,  
269 Physical Review Letters 77 (5) (1996) 960.

- 270 [6] R. Kotter, Online retrieval, processing, and visualization of primate  
271 connectivity data from the CoCoMac database, *Neuroinformatics* 2 (2)  
272 (2004) 127–144.
- 273 [7] E. J. Doedel, A. R. Champneys, T. F. Fairgrieve, Y. A. Kuznetsov,  
274 B. Sandstede, X. Wang, *AUTO 97: Continuation and bifurcation soft-*  
275 *ware for ordinary differential equations (with HomCont)* (1998).
- 276 [8] B. Ermentrout, *Simulating, analyzing, and animating dynamical sys-*  
277 *tems: a guide to XPPAUT for researchers and students*, SIAM, 2002.
- 278 [9] A. Dhooge, W. Govaerts, Y. A. Kuznetsov, *MATCONT: a MATLAB*  
279 *package for numerical bifurcation analysis of ODEs*, *ACM Transactions*  
280 *on Mathematical Software (TOMS)* 29 (2) (2003) 141–164.
- 281 [10] R. Clewley, *Hybrid Models and Biological Model Reduction with*  
282 *PyDSTool*, *PLOS Computational Biology* 8 (8) (2012) e1002628.  
283 doi:10.1371/journal.pcbi.1002628.
- 284 [11] H. Dankowicz, F. Schilder, *Recipes for Continuation*, SIAM, 2013.
- 285 [12] J. W. Eaton, *GNU Octave Manual*, Network Theory Limited, 2002.
- 286 [13] J. L. Hindmarsh, R. M. Rose, *A model of neuronal bursting using three*  
287 *coupled first order differential equations*, *Proceedings of the Royal So-*  
288 *ciety of London B: Biological Sciences* 221 (1222) (1984) 87–102.
- 289 [14] S. Heitmann, M. Breakspear, *Handbook for the Brain Dynamics Tool-*  
290 *box: Version 2017c, 1st Edition*, QIMR Berghofer Medical Research  
291 Institute, 2017.

292 **Required Metadata**

293 **Current executable software version**

| <b>Nr.</b> | <b>(executable) Software metadata description</b>                                                                      | <b>Please fill in this column</b>                                                                                                                       |
|------------|------------------------------------------------------------------------------------------------------------------------|---------------------------------------------------------------------------------------------------------------------------------------------------------|
| S1         | Current software version                                                                                               | 2017c                                                                                                                                                   |
| S2         | Permanent link to executables of this version                                                                          | <a href="https://github.com/breakspear/bdtoolkit/releases/tag/bdtoolkit-2017c">https://github.com/breakspear/bdtoolkit/releases/tag/bdtoolkit-2017c</a> |
| S3         | Legal Software License                                                                                                 | BSD 2-clause                                                                                                                                            |
| S4         | Computing platform/Operating System                                                                                    | Matlab 2014b or newer                                                                                                                                   |
| S5         | Installation requirements & dependencies                                                                               | Signal Processing Toolbox (optional). Statistics and Machine Learning Toolbox (optional).                                                               |
| S6         | If available, link to user manual - if formally published include a reference to the publication in the reference list | <a href="http://www.bdtoolbox.org">http://www.bdtoolbox.org</a>                                                                                         |
| S7         | Support email for questions                                                                                            | heitmann@bdtoolbox.org                                                                                                                                  |

Table 1: Software metadata (optional)

294 **Current code version**

| <b>Nr.</b> | <b>Code metadata description</b>                                | <b>Please fill in this column</b>                                                                                                                       |
|------------|-----------------------------------------------------------------|---------------------------------------------------------------------------------------------------------------------------------------------------------|
| C1         | Current code version                                            | 2017c                                                                                                                                                   |
| C2         | Permanent link to code/repository used of this code version     | <a href="https://github.com/breakspear/bdtoolkit/releases/tag/bdtoolkit-2017c">https://github.com/breakspear/bdtoolkit/releases/tag/bdtoolkit-2017c</a> |
| C3         | Legal Code License                                              | BSD 2-clause                                                                                                                                            |
| C4         | Code versioning system used                                     | git                                                                                                                                                     |
| C5         | Software code languages, tools, and services used               | Matlab 2014b or newer                                                                                                                                   |
| C6         | Compilation requirements, operating environments & dependencies | Signal Processing Toolbox (optional). Statistics and Machine Learning Toolbox (optional).                                                               |
| C7         | If available Link to developer documentation/manual             | <a href="http://www.bdtoolbox.org">http://www.bdtoolbox.org</a>                                                                                         |
| C8         | Support email for questions                                     | heitmann@bdtoolbox.org                                                                                                                                  |

Table 2: Code metadata (mandatory)
